# Supplementary material for: Study of Global Transcriptional Changes of N-GlcNAc2 Proteins-Producing T24 Bladder Carcinoma Cells under Glucose Deprivation
Source: PubMed Central journal article supplement (PMC3613393; doi:10.1371/journal.pone.0060397), 2013-04-01
Supplement: pone.0060397.s001.pdf [file pone.0060397.s001.pdf]

**Table S1. Oligonucleotides used for qRT-PCR**

| Gene         | Forward                  | Reverse                  |
|--------------|--------------------------|--------------------------|
| <i>AURKA</i> | ATTCAGGACCTGTTAAGCTAC    | TCTGATTCTGAACCGGCTTGTG   |
| <i>AURKB</i> | CACTTCACAATTGATGACTTTGAG | CAGGATGTTGGGATGGTGCAG    |
| <i>CDK1</i>  | TGGAGTTGTATAAGGGTAGAC    | ATAAGCACATCCTGAAGACTGAC  |
| <i>NEK2</i>  | CCCTGAAGGAATGCCACAGAC    | TGCGATTCATTTGTTTCAGGAGAC |
| <i>PLK1</i>  | AGATCAACTTCTTCCAGGATCAC  | TGAGACGGTTGCTGGCCGAG     |
| <i>ATF3</i>  | TGCCTGTCCCCTCCTGGGTC     | TCTTCTTCAGGGGCTACCTCG    |
| <i>ATF4</i>  | TCCAACAACAGCAAGGAGGATG   | GGGCAAAGAGATCACAAGTGTC   |
| <i>FOXO1</i> | AAGCTCCCAAGTGACTTGGATG   | AGTACTTTTAAGTGTAACCTGCTC |
| <i>GAPDH</i> | GGGAGCCAAAAGGGTCTCATC    | TGGCATGGACTGTGGCCGAG     |
