# Supplementary material for: Study of Global Transcriptional Changes of N-GlcNAc2 Proteins-Producing T24 Bladder Carcinoma Cells under Glucose Deprivation
Source: PubMed Central journal article supplement (PMC3613393; doi:10.1371/journal.pone.0060397), 2013-04-01
Supplement: pone.0060397.s002.pdf [file pone.0060397.s002.pdf]

**Table S2. Summary of sample data**

| Sample Name        | Number of Lanes | Avg. Cluster Raw | Avg. % PF Cluster | Avg. % Align PF | Genes        |
|--------------------|-----------------|------------------|-------------------|-----------------|--------------|
| 25mM Glucose-I     | 1               | 218197           | 88.06             | 73.38           | 14974 /21407 |
| 25mM Glucose-II    | 1               | 369209           | 73.01             | 76.38           | 15303 /21407 |
| 25mM Glucose-III   | 1               | 521963           | 60.59             | 77.39           | 15700 /21407 |
| 0mM Glucose 3h-I   | 1               | 329361           | 77.22             | 74.35           | 15543 /21407 |
| 0mM Glucose 3h-II  | 1               | 283961           | 83.44             | 74.44           | 15489 /21407 |
| 0mM Glucose 6h-I   | 1               | 381234           | 40.23             | 75.37           | 14202 /21407 |
| 0mM Glucose 6h-II  | 1               | 253300           | 88.01             | 77.11           | 15520 /21407 |
| 0mM Glucose 9h-I   | 1               | 321191           | 80.78             | 76.18           | 15283/21407  |
| 0mM Glucose 9h-II  | 1               | 483075           | 62.9              | 71.95           | 16218/21407  |
| 0mM Glucose 24h-I  | 1               | 279560           | 85.41             | 75.81           | 14901/21407  |
| 0mM Glucose 24h-II | 1               | 222604           | 87.83             | 71.47           | 14873/21407  |

Number of Lanes : Number of the lane on the flow cell

Avg. Cluster Raw : Average number of cluster per tile

Avg. % PF Cluster : Average % of clusters passing filter

Avg. % Align PF : Average % of clusters that could be aligned to the genome in clusters passing filter

Genes : Number of genes that could be aligned to the genome
