# Supplementary material for: Study of Global Transcriptional Changes of N-GlcNAc2 Proteins-Producing T24 Bladder Carcinoma Cells under Glucose Deprivation
Source: PubMed Central journal article supplement (PMC3613393; doi:10.1371/journal.pone.0060397), 2013-04-01
Supplement: pone.0060397.s003.pdf [file pone.0060397.s003.pdf]

Table S3. Lists of genes, which statically two fold up- and down-changed in most significantly up- (A) and down (B)-regulated pathways (p < 0.0001) (Ref. Table 1).

| A       |         |         |          |          |     |       |     |            |             |             |         |         |        |         |                        |        |        |        |         |
|---------|---------|---------|----------|----------|-----|-------|-----|------------|-------------|-------------|---------|---------|--------|---------|------------------------|--------|--------|--------|---------|
| Pathway |         |         |          |          |     |       |     |            |             | RPKM values |         |         |        |         | RPKM values (relative) |        |        |        |         |
| AP1     | ATF-2   | RAC-1   | p53      | Glypican | URP | HIF-1 | IGF | UDP-GlcNAc | Gene Symbol | 25mM        | 0mM_3h  | 0mM_6h  | 0mM_9h | 0mM_24h | 25mM                   | 0mM_3h | 0mM_6h | 0mM_9h | 0mM_24h |
|         |         | ARHGEF2 |          |          |     |       |     |            | ARHGEF2     | 20.63       | 40.54   | 51.00   | 58.22  | 56.39   | 1.00                   | 1.97   | 2.47   | 2.82   | 2.73    |
|         |         |         |          |          |     |       |     |            | ASNS        | 9.76        | 62.31   | 119.11  | 110.96 | 90.32   | 1.00                   | 6.38   | 12.20  | 11.37  | 9.25    |
| ATF4    | ATF3    | ATF3    | ATF3     |          |     |       |     |            | ATF3        | 0.43        | 17.05   | 9.28    | 9.93   | 15.38   | 1.00                   | 39.65  | 21.58  | 23.09  | 35.76   |
|         |         | ATF4    |          | ATF4     |     |       |     |            | ATF4        | 98.82       | 274.43  | 283.24  | 336.25 | 613.16  | 1.00                   | 2.78   | 2.87   | 3.40   | 6.20    |
|         |         |         | BCL2A1   |          |     |       |     |            | BCL2A1      | 3.17        | 20.73   | 21.44   | 10.19  | 0.77    | 1.00                   | 6.54   | 6.76   | 3.21   | 0.24    |
| CASP3   |         |         |          |          |     |       |     |            | CASP3       | 16.55       | 28.61   | 52.42   | 39.91  | 8.40    | 1.00                   | 1.73   | 3.17   | 2.41   | 0.51    |
|         |         |         |          |          |     |       |     |            | CTGF        | 12.11       | 253.60  | 174.48  | 146.08 | 32.50   | 1.00                   | 20.95  | 14.41  | 12.07  | 2.68    |
|         |         |         |          |          |     |       |     |            | CYR61       | 49.48       | 499.28  | 254.48  | 194.17 | 87.82   | 1.00                   | 10.09  | 5.14   | 3.92   | 1.77    |
|         | DDIT3   | DDIT3   |          |          |     |       |     |            | DDIT3       | 19.19       | 408.29  | 393.41  | 512.04 | 490.88  | 1.00                   | 21.28  | 20.50  | 26.68  | 25.58   |
|         |         | DNAJC3  |          |          |     |       |     | DNAJC3     | DNAJC3      | 13.76       | 27.24   | 81.02   | 94.22  | 34.61   | 1.00                   | 1.98   | 5.89   | 6.85   | 2.52    |
|         | DUSP1   | DUSP1   | DUSP1    | DUSP1    |     |       |     |            | DUSP1       | 34.97       | 246.35  | 142.87  | 108.02 | 64.10   | 1.00                   | 7.04   | 4.09   | 3.09   | 1.83    |
|         | DUSP5   | DUSP5   | DUSP5    |          |     |       |     |            | DUSP5       | 14.67       | 74.60   | 72.74   | 69.99  | 111.20  | 1.00                   | 5.09   | 4.96   | 4.77   | 7.58    |
| EGR2    |         |         |          |          |     |       |     |            | EDN1        | 0.19        | 4.75    | 2.82    | 1.02   | 0.42    | 1.00                   | 24.61  | 14.59  | 5.26   | 2.18    |
|         |         |         |          |          |     |       |     |            | EGR2        | 0.05        | 0.39    | 0.20    | 0.26   | 0.15    | 1.00                   | 7.32   | 3.66   | 4.88   | 2.81    |
|         |         |         |          |          |     |       |     |            | EIF2AK3     | 4.80        | 8.59    | 11.98   | 11.03  | 6.06    | 1.00                   | 1.79   | 2.49   | 2.30   | 1.26    |
|         |         |         |          |          |     |       |     |            | FGF2        | 12.00       | 44.76   | 76.11   | 63.08  | 31.44   | 1.00                   | 3.73   | 6.34   | 5.26   | 2.62    |
|         |         |         |          |          |     |       |     |            | FHL2        | 27.10       | 99.41   | 95.45   | 62.11  | 37.99   | 1.00                   | 3.67   | 3.52   | 2.29   | 1.40    |
| FOS     | FOS     |         |          |          |     |       |     |            | FOS         | 0.57        | 3.94    | 4.15    | 5.52   | 9.01    | 1.00                   | 6.91   | 7.27   | 9.68   | 15.80   |
|         | GADD45A | GADD45A | GADD45A  |          |     |       |     |            | GADD45A     | 25.00       | 269.26  | 240.30  | 188.47 | 142.88  | 1.00                   | 10.77  | 9.61   | 7.54   | 5.72    |
|         |         |         |          | GADD45B  |     |       |     |            | GADD45B     | 6.74        | 46.84   | 26.59   | 24.79  | 25.17   | 1.00                   | 6.95   | 3.95   | 3.68   | 3.73    |
|         |         |         |          |          |     |       |     |            | GFPT1       | 15.18       | 26.74   | 92.26   | 93.17  | 53.88   | 1.00                   | 1.76   | 6.08   | 6.14   | 3.55    |
|         |         |         |          |          |     |       |     |            | HERPUD1     | 23.87       | 289.16  | 304.54  | 289.10 | 191.89  | 1.00                   | 12.11  | 12.76  | 12.11  | 8.04    |
| HMOX1   |         |         |          |          |     |       |     |            | HMOX1       | 34.71       | 295.68  | 340.13  | 548.89 | 691.14  | 1.00                   | 8.52   | 9.80   | 15.81  | 19.91   |
|         |         |         | HSPA1A   |          |     |       |     |            | HSPA1A      | 12.61       | 38.75   | 70.29   | 107.30 | 217.86  | 1.00                   | 3.07   | 5.57   | 8.51   | 17.28   |
|         |         |         |          | ID2      |     |       |     |            | ID2         | 1.34        | 4.40    | 2.92    | 3.24   | 2.67    | 1.00                   | 3.28   | 2.18   | 2.41   | 1.99    |
|         |         |         |          |          |     |       |     |            | IGFBP1      | 0.62        | 3.07    | 3.81    | 2.09   | 8.44    | 1.00                   | 4.92   | 6.12   | 3.35   | 13.55   |
|         |         |         |          |          |     |       |     |            | IGFBP3      | 1.38        | 6.00    | 6.44    | 5.58   | 6.53    | 1.00                   | 4.34   | 4.67   | 4.04   | 4.73    |
|         |         |         |          |          |     |       |     |            | IGFBP5      | 0.04        | 0.29    | 0.17    | 0.21   | 0.01    | 1.00                   | 6.58   | 3.81   | 4.85   | 0.23    |
|         | IL23A   | IL23A   |          |          |     |       |     |            | IL23A       | 0.24        | 1.13    | 1.28    | 1.11   | 0.76    | 1.00                   | 4.64   | 5.24   | 4.56   | 3.12    |
| IL6     | IL6     | IL6     |          |          |     |       |     |            | IL6         | 5.76        | 104.77  | 99.39   | 59.55  | 33.87   | 1.00                   | 18.19  | 17.26  | 10.34  | 5.88    |
| IL8     | IL8     |         |          |          |     |       |     |            | IL8         | 127.06      | 1109.16 | 1007.69 | 684.11 | 173.11  | 1.00                   | 8.73   | 7.93   | 5.38   | 1.36    |
|         | JDP2    | JDP2    |          |          |     |       |     |            | JDP2        | 1.80        | 5.49    | 5.68    | 7.27   | 10.52   | 1.00                   | 3.05   | 3.15   | 4.04   | 5.84    |
|         |         |         |          |          |     |       |     |            | KLF4        | 2.43        | 6.61    | 7.71    | 9.02   | 17.33   | 1.00                   | 2.72   | 3.17   | 3.71   | 7.13    |
|         |         |         |          |          |     |       |     |            | MDM4        | 3.70        | 6.49    | 8.96    | 7.13   | 3.72    | 1.00                   | 1.75   | 2.42   | 1.93   | 1.01    |
| MMP1    |         |         |          |          |     |       |     |            | MMP1        | 9.25        | 25.52   | 53.35   | 49.78  | 14.98   | 1.00                   | 2.76   | 5.77   | 5.38   | 1.62    |
|         |         |         |          |          |     |       |     |            | NLRC4       | 0.19        | 0.21    | 0.81    | 1.20   | 3.21    | 1.00                   | 1.06   | 4.16   | 6.18   | 16.58   |
|         |         |         |          |          |     |       |     |            | NRG1        | 2.11        | 8.65    | 9.42    | 6.41   | 3.80    | 1.00                   | 4.10   | 4.46   | 3.04   | 1.80    |
|         |         |         |          |          |     |       |     |            | PAWR        | 17.80       | 30.59   | 48.69   | 42.10  | 28.42   | 1.00                   | 1.72   | 2.74   | 2.37   | 1.60    |
|         |         |         |          |          |     |       |     |            | PGM3        | 19.93       | 21.09   | 66.12   | 64.49  | 19.97   | 1.00                   | 1.06   | 3.32   | 3.24   | 1.00    |
|         |         |         |          |          |     |       |     |            | PIP5K1B     | 0.00        | 0.05    | 0.05    | 0.06   | 0.08    | nd                     | nd     | nd     | nd     | nd      |
| PLAUR   |         |         |          |          |     |       |     |            | PLAUR       | 17.91       | 35.14   | 40.01   | 53.27  | 23.69   | 1.00                   | 1.96   | 2.23   | 2.97   | 1.32    |
|         |         |         |          |          |     |       |     |            | PLK3        | 6.77        | 34.62   | 21.50   | 21.97  | 21.85   | 1.00                   | 5.11   | 3.18   | 3.25   | 3.23    |
| PRKCE   |         |         |          |          |     |       |     |            | PRKCE       | 3.05        | 3.91    | 7.67    | 9.36   | 8.05    | 1.00                   | 1.28   | 2.51   | 3.07   | 2.64    |
|         |         |         |          |          |     |       |     |            | RASGRF2     | 0.12        | 0.12    | 0.69    | 1.28   | 1.77    | 1.00                   | 1.00   | 5.71   | 10.67  | 14.71   |
| RCAN1   |         |         |          |          |     |       |     |            | RCAN1       | 6.96        | 20.96   | 26.26   | 23.58  | 8.91    | 1.00                   | 3.01   | 3.77   | 3.39   | 1.28    |
|         |         |         |          |          |     |       |     |            | RCHY1       | 4.00        | 4.89    | 10.05   | 9.56   | 4.71    | 1.00                   | 1.22   | 2.51   | 2.39   | 1.18    |
|         | SERPIN5 | SERPIN5 | SERPIN5  |          |     |       |     |            | SERPIN5     | 20.43       | 53.00   | 70.33   | 39.28  | 19.29   | 1.00                   | 2.59   | 3.44   | 1.92   | 0.94    |
|         |         |         | SERPINE1 |          |     |       |     |            | SERPINE1    | 73.79       | 394.05  | 202.27  | 155.38 | 29.30   | 1.00                   | 5.34   | 2.74   | 2.11   | 0.40    |

|        |       |       |  |      |  |  |  |  |  |  |        |        |        |        |        |         |      |       |       |       |       |
|--------|-------|-------|--|------|--|--|--|--|--|--|--------|--------|--------|--------|--------|---------|------|-------|-------|-------|-------|
|        |       |       |  | SGK1 |  |  |  |  |  |  | SGK1   | 2.09   | 37.07  | 28.06  | 18.30  | 8.75    | 1.00 | 17.74 | 13.42 | 8.76  | 4.19  |
| SLC3A2 |       |       |  |      |  |  |  |  |  |  | SLC3A2 | 64.37  | 222.40 | 245.56 | 380.13 | 1580.55 | 1.00 | 3.46  | 3.81  | 5.91  | 24.55 |
|        |       |       |  |      |  |  |  |  |  |  | SMURF2 | 42.25  | 101.49 | 139.90 | 127.23 | 31.84   | 1.00 | 2.40  | 3.31  | 3.01  | 0.75  |
|        | TGFB2 | TGFB2 |  |      |  |  |  |  |  |  | TGFB2  | 0.17   | 1.98   | 1.22   | 0.51   | 0.97    | 1.00 | 11.85 | 7.29  | 3.06  | 5.82  |
|        |       |       |  |      |  |  |  |  |  |  | TGIF1  | 22.73  | 35.96  | 61.43  | 54.59  | 54.73   | 1.00 | 1.58  | 2.70  | 2.40  | 2.41  |
| THBD   |       |       |  |      |  |  |  |  |  |  | THBD   | 2.02   | 9.86   | 37.12  | 28.75  | 13.05   | 1.00 | 4.88  | 18.37 | 14.23 | 6.46  |
|        |       |       |  |      |  |  |  |  |  |  | TXNRD1 | 123.12 | 238.09 | 314.73 | 406.64 | 582.04  | 1.00 | 1.93  | 2.56  | 3.30  | 4.73  |
|        |       |       |  |      |  |  |  |  |  |  | UAP1   | 50.35  | 165.14 | 325.21 | 292.21 | 61.24   | 1.00 | 3.28  | 6.46  | 5.80  | 1.22  |
|        |       |       |  |      |  |  |  |  |  |  | VEGFA  | 27.05  | 50.26  | 73.04  | 91.09  | 80.11   | 1.00 | 1.86  | 2.70  | 3.37  | 2.96  |
|        |       |       |  |      |  |  |  |  |  |  | WIP1   | 17.03  | 13.26  | 45.87  | 78.72  | 62.05   | 1.00 | 0.78  | 2.69  | 4.62  | 3.64  |
|        |       |       |  |      |  |  |  |  |  |  | XBP1   | 54.63  | 200.41 | 168.41 | 134.42 | 173.54  | 1.00 | 3.67  | 3.08  | 2.46  | 3.18  |

B

|       |            | Pathway  |          |          |              |       |      |            |      |                 |             | RPKM values |        |        |        |         | RPKM values (relative) |        |        |        |         |
|-------|------------|----------|----------|----------|--------------|-------|------|------------|------|-----------------|-------------|-------------|--------|--------|--------|---------|------------------------|--------|--------|--------|---------|
| EPHB  | Fatty acid | Androgen | Glypican | Syndecan | beta catenin | ncWnt | Wnt  | N-cadherin | PLK1 | G2/M transition | Gene Symbol | 25mM        | 0mM_3h | 0mM_6h | 0mM_9h | 0mM_24h | 25mM                   | 0mM_3h | 0mM_6h | 0mM_9h | 0mM_24h |
|       |            |          |          |          |              |       |      |            |      |                 | ACACA       | 25.54       | 18.55  | 11.81  | 8.19   | 16.44   | 1.00                   | 0.73   | 0.46   | 0.32   | 0.64    |
|       |            |          |          |          |              |       |      |            |      |                 | ACACB       | 0.88        | 0.76   | 0.38   | 0.34   | 0.31    | 1.00                   | 0.86   | 0.43   | 0.39   | 0.35    |
|       |            |          |          |          |              |       |      |            |      |                 | AGPAT3      | 14.86       | 10.36  | 5.98   | 6.28   | 11.43   | 1.00                   | 0.70   | 0.40   | 0.42   | 0.77    |
|       |            |          |          |          |              |       |      |            |      |                 | AGPAT4      | 2.81        | 1.89   | 1.06   | 1.48   | 1.24    | 1.00                   | 0.67   | 0.38   | 0.53   | 0.44    |
|       |            |          | BCL9     | BCL9     | BCL9         | BCL9  | BCL9 | BCL9       |      |                 | BCL9        | 3.95        | 1.10   | 1.02   | 2.07   | 2.94    | 1.00                   | 0.28   | 0.26   | 0.52   | 0.74    |
|       |            |          |          |          |              |       |      |            |      | BUB1B           | 26.19       | 16.76       | 9.89   | 8.89   | 1.80   | 1.00    | 0.64                   | 0.38   | 0.34   | 0.07   |         |
|       |            |          |          |          |              |       |      |            |      | CAMK2G          | 20.64       | 12.67       | 8.07   | 9.82   | 16.51  | 1.00    | 0.61                   | 0.39   | 0.48   | 0.80   |         |
|       |            |          |          |          |              |       |      |            |      | CDC14B          | 4.62        | 3.33        | 1.85   | 1.51   | 3.23   | 1.00    | 0.72                   | 0.40   | 0.33   | 0.70   |         |
|       |            |          |          |          |              |       |      |            |      | CDC25B          | 112.41      | 80.97       | 35.67  | 33.92  | 34.95  | 1.00    | 0.72                   | 0.32   | 0.30   | 0.31   |         |
|       |            |          |          |          |              |       |      |            |      | CEP250          | 16.69       | 10.09       | 4.83   | 6.98   | 11.84  | 1.00    | 0.60                   | 0.29   | 0.42   | 0.71   |         |
|       |            |          |          |          |              |       |      |            |      | CHD7            | 5.09        | 1.80        | 1.01   | 1.44   | 2.59   | 1.00    | 0.35                   | 0.20   | 0.28   | 0.51   |         |
|       |            |          |          |          |              |       |      |            |      | CTDSP1          | 34.71       | 17.73       | 10.27  | 14.15  | 30.63  | 1.00    | 0.51                   | 0.30   | 0.41   | 0.88   |         |
|       |            |          |          |          |              |       |      |            |      | CTDSP2          | 45.01       | 19.13       | 12.71  | 16.87  | 31.69  | 1.00    | 0.42                   | 0.28   | 0.37   | 0.70   |         |
|       | DGAT2      |          |          |          |              |       |      |            |      | DGAT2           | 2.14        | 0.73        | 0.29   | 0.22   | 1.27   | 1.00    | 0.34                   | 0.13   | 0.10   | 0.59   |         |
|       |            |          |          |          |              |       |      |            |      | DLGAP5          | 41.36       | 29.86       | 19.29  | 13.88  | 1.51   | 1.00    | 0.72                   | 0.47   | 0.34   | 0.04   |         |
| DNM1  |            |          |          |          |              |       |      |            |      | DNM1            | 6.64        | 4.89        | 3.16   | 2.86   | 1.75   | 1.00    | 0.74                   | 0.47   | 0.43   | 0.26   |         |
|       |            |          |          |          |              |       |      |            |      | EEF2K           | 9.32        | 5.79        | 2.91   | 3.84   | 6.31   | 1.00    | 0.62                   | 0.31   | 0.41   | 0.68   |         |
| EFNA5 |            |          |          |          |              |       |      |            |      | EFNA5           | 6.07        | 2.91        | 1.81   | 2.37   | 8.30   | 1.00    | 0.48                   | 0.30   | 0.39   | 1.37   |         |
|       |            |          |          |          |              |       |      |            |      | EHMT2           | 20.74       | 14.31       | 7.16   | 8.70   | 23.06  | 1.00    | 0.69                   | 0.35   | 0.42   | 1.11   |         |
|       |            |          |          |          |              |       |      |            |      | ELOVL3          | 0.58        | 0.14        | 0.02   | 0.06   | 0.06   | 1.00    | 0.23                   | 0.03   | 0.10   | 0.10   |         |
|       |            |          |          |          |              |       |      |            |      | ELOVL6          | 17.46       | 7.23        | 4.10   | 4.98   | 5.92   | 1.00    | 0.41                   | 0.23   | 0.28   | 0.34   |         |
| EPHB4 |            |          |          |          |              |       |      |            |      | EPHB4           | 12.38       | 5.34        | 1.47   | 2.49   | 10.24  | 1.00    | 0.43                   | 0.12   | 0.20   | 0.83   |         |
|       |            |          |          |          |              |       |      |            |      | ERC1            | 19.62       | 10.51       | 5.18   | 8.45   | 11.47  | 1.00    | 0.54                   | 0.26   | 0.43   | 0.58   |         |
|       |            |          |          |          |              |       |      |            |      | ETV1            | 6.66        | 2.86        | 0.78   | 0.30   | 0.46   | 1.00    | 0.43                   | 0.12   | 0.05   | 0.07   |         |
|       |            |          |          |          |              |       |      |            |      | FAM123B         | 1.39        | 0.48        | 0.38   | 0.75   | 1.30   | 1.00    | 0.35                   | 0.27   | 0.54   | 0.94   |         |
|       |            |          |          |          |              |       |      |            |      | FOXO1           | 4.80        | 3.57        | 1.08   | 0.85   | 2.07   | 1.00    | 0.74                   | 0.22   | 0.18   | 0.43   |         |
|       |            |          |          |          |              |       |      |            |      | FZD1            | 0.65        | 0.38        | 0.22   | 0.22   | 0.48   | 1.00    | 0.58                   | 0.33   | 0.34   | 0.74   |         |
|       |            |          |          |          |              |       |      |            |      | FZD5            | 1.81        | 0.80        | 0.61   | 0.98   | 2.13   | 1.00    | 0.44                   | 0.34   | 0.54   | 1.18   |         |
|       |            |          |          |          |              |       |      |            |      | FZD7            | 1.80        | 0.79        | 0.54   | 0.78   | 1.58   | 1.00    | 0.44                   | 0.30   | 0.43   | 0.88   |         |
|       |            |          |          |          |              |       |      |            |      | FZD8            | 17.95       | 5.02        | 3.19   | 3.45   | 6.85   | 1.00    | 0.28                   | 0.18   | 0.19   | 0.38   |         |
|       |            |          |          |          |              |       |      |            |      | GAB1            | 2.81        | 0.84        | 0.47   | 0.50   | 1.46   | 1.00    | 0.30                   | 0.17   | 0.18   | 0.52   |         |
| GRB7  |            |          |          |          |              |       |      |            |      | GRB7            | 2.40        | 0.20        | 0.06   | 0.15   | 0.41   | 1.00    | 0.08                   | 0.02   | 0.06   | 0.17   |         |
|       |            |          |          |          |              |       |      |            |      | HIP1            | 10.17       | 5.90        | 2.38   | 2.23   | 2.30   | 1.00    | 0.58                   | 0.23   | 0.22   | 0.23   |         |
|       |            |          |          |          |              |       |      |            |      | HOXB13          | 5.57        | 1.24        | 0.62   | 0.49   | 2.56   | 1.00    | 0.22                   | 0.11   | 0.09   | 0.46   |         |
|       |            |          |          |          |              |       |      |            |      | IL17RD          | 1.68        | 0.64        | 0.17   | 0.21   | 0.45   | 1.00    | 0.38                   | 0.10   | 0.12   | 0.27   |         |
|       |            |          |          |          |              |       |      |            |      | INCENP          | 26.85       | 13.05       | 9.76   | 13.60  | 5.45   | 1.00    | 0.49                   | 0.36   | 0.51   | 0.20   |         |
| KALRN |            |          |          |          |              |       |      |            |      | KALRN           | 0.42        | 0.40        | 0.19   | 0.12   | 0.07   | 1.00    | 0.95                   | 0.45   | 0.29   | 0.17   |         |
|       |            |          |          |          |              |       |      |            |      | KDM3A           | 21.78       | 6.01        | 7.50   | 10.04  | 17.27  | 1.00    | 0.28                   | 0.34   | 0.46   | 0.79   |         |

|       |         |          |         |         |         |         |         |          |          |        |        |       |       |       |      |      |      |      |      |
|-------|---------|----------|---------|---------|---------|---------|---------|----------|----------|--------|--------|-------|-------|-------|------|------|------|------|------|
|       |         |          |         |         |         |         |         | KIF20A   | KIF20A   | 0.42   | 0.40   | 0.19  | 0.12  | 0.07  | 1.00 | 0.95 | 0.45 | 0.29 | 0.17 |
|       |         |          |         |         |         |         |         | KREMEN1  | KREMEN1  | 3.32   | 1.57   | 0.87  | 0.78  | 1.77  | 1.00 | 0.47 | 0.26 | 0.23 | 0.53 |
|       |         |          | LAMA3   |         |         |         |         | LAMA3    | LAMA3    | 2.31   | 1.19   | 0.82  | 0.82  | 0.52  | 1.00 | 0.51 | 0.35 | 0.35 | 0.22 |
| LPIN1 |         |          |         |         |         |         |         | LPIN1    | LPIN1    | 30.03  | 20.26  | 10.12 | 8.85  | 19.28 | 1.00 | 0.67 | 0.34 | 0.29 | 0.64 |
|       | MAP2K6  | MAP2K6   |         |         |         |         |         | MAP2K6   | MAP2K6   | 1.63   | 1.19   | 0.84  | 0.60  | 2.50  | 1.00 | 0.73 | 0.52 | 0.37 | 1.53 |
|       |         | MAP3K12  |         |         |         |         |         | MAP3K12  | MAP3K12  | 10.36  | 5.65   | 3.08  | 4.87  | 10.05 | 1.00 | 0.55 | 0.30 | 0.47 | 0.97 |
|       |         | MAP3K4   |         |         |         |         |         | MAP3K4   | MAP3K4   | 15.76  | 13.31  | 6.59  | 5.54  | 5.19  | 1.00 | 0.84 | 0.42 | 0.35 | 0.33 |
|       |         | MAP3K8   |         |         |         |         |         | MAP3K8   | MAP3K8   | 1.52   | 0.95   | 0.34  | 0.41  | 0.55  | 1.00 | 0.63 | 0.22 | 0.27 | 0.36 |
|       | MAPK14  | MAPK14   |         |         |         |         |         | MAPK14   | MAPK14   | 23.44  | 11.99  | 9.13  | 9.29  | 10.80 | 1.00 | 0.51 | 0.39 | 0.40 | 0.46 |
|       |         | MAPKAPK3 |         |         |         |         |         | MAPKAPK3 | MAPKAPK3 | 14.94  | 8.93   | 5.36  | 6.75  | 39.82 | 1.00 | 0.60 | 0.36 | 0.45 | 2.66 |
|       |         |          |         |         |         |         |         | MXI1     | MXI1     | 32.60  | 12.19  | 8.15  | 7.40  | 24.02 | 1.00 | 0.37 | 0.25 | 0.23 | 0.74 |
|       | NCOA1   |          |         |         |         |         |         | NCOA1    | NCOA1    | 7.26   | 5.33   | 3.09  | 3.46  | 7.27  | 1.00 | 0.73 | 0.43 | 0.48 | 1.00 |
|       | NCOA2   | NCOA2    | NCOA2   | NCOA2   | NCOA2   | NCOA2   | NCOA2   | NCOA2    | NCOA2    | 7.60   | 3.44   | 1.98  | 3.09  | 5.16  | 1.00 | 0.45 | 0.26 | 0.41 | 0.68 |
|       |         |          |         |         |         |         |         | NFKBIA   | NFKBIA   | 127.34 | 177.51 | 59.73 | 35.89 | 32.56 | 1.00 | 1.39 | 0.47 | 0.28 | 0.26 |
|       | NRIP1   | NRIP1    | NRIP1   | NRIP1   | NRIP1   | NRIP1   | NRIP1   | NRIP1    | NRIP1    | 21.42  | 16.07  | 11.40 | 7.13  | 3.90  | 1.00 | 0.75 | 0.53 | 0.33 | 0.18 |
|       |         |          |         |         |         |         |         | NUMA1    | NUMA1    | 57.90  | 31.13  | 18.94 | 25.99 | 35.30 | 1.00 | 0.54 | 0.33 | 0.45 | 0.61 |
|       |         |          |         | PAG1    |         |         |         | PAG1     | PAG1     | 1.24   | 0.38   | 0.18  | 0.18  | 0.29  | 1.00 | 0.30 | 0.15 | 0.14 | 0.23 |
| PAK1  |         | PAK1     | PAK1    |         | PAK1    |         |         | PAK1     | PAK1     | 36.44  | 23.38  | 16.18 | 11.67 | 20.02 | 1.00 | 0.64 | 0.44 | 0.32 | 0.55 |
|       | PATZ1   | PATZ1    | PATZ1   | PATZ1   | PATZ1   | PATZ1   | PATZ1   | PATZ1    | PATZ1    | 14.57  | 8.47   | 4.54  | 6.85  | 21.29 | 1.00 | 0.58 | 0.31 | 0.47 | 1.46 |
|       | POU2F1  |          |         |         |         |         |         | POU2F1   | POU2F1   | 3.31   | 1.55   | 1.07  | 1.62  | 2.83  | 1.00 | 0.47 | 0.32 | 0.49 | 0.85 |
| PPARA |         |          |         |         |         |         |         | PPARA    | PPARA    | 7.09   | 2.38   | 1.73  | 3.60  | 6.88  | 1.00 | 0.34 | 0.24 | 0.51 | 0.97 |
|       |         |          | PPARG   |         | PPARG   |         |         | PPARG    | PPARG    | 66.87  | 20.14  | 19.18 | 14.61 | 34.35 | 1.00 | 0.30 | 0.29 | 0.22 | 0.51 |
|       |         |          | PRKCD   |         |         |         |         | PRKCD    | PRKCD    | 11.77  | 5.91   | 3.30  | 6.31  | 13.90 | 1.00 | 0.50 | 0.28 | 0.54 | 1.18 |
|       |         |          | PTCH1   |         |         |         |         | PTCH1    | PTCH1    | 1.76   | 0.38   | 0.26  | 0.45  | 1.78  | 1.00 | 0.21 | 0.15 | 0.25 | 1.01 |
|       |         |          |         |         |         |         |         | RASGRF1  | RASGRF1  | 0.33   | 0.16   | 0.10  | 0.11  | 0.64  | 1.00 | 0.47 | 0.29 | 0.32 | 1.92 |
|       |         |          |         |         |         |         | RIN2    | RIN2     | 47.36    | 16.61  | 16.32  | 16.05 | 7.19  | 1.00  | 0.35 | 0.34 | 0.34 | 0.15 |      |
|       |         |          |         |         |         |         | RPS6KA1 | RPS6KA1  | 29.76    | 17.04  | 4.51   | 5.93  | 23.78 | 1.00  | 0.57 | 0.15 | 0.20 | 0.80 |      |
|       |         |          |         |         |         |         | RUNX2   | RUNX2    | 6.16     | 1.67   | 1.45   | 0.98  | 0.97  | 1.00  | 0.27 | 0.23 | 0.16 | 0.16 |      |
| RXRA  |         |          |         |         |         |         |         | RXRA     | RXRA     | 13.98  | 7.25   | 2.54  | 3.86  | 11.05 | 1.00 | 0.52 | 0.18 | 0.28 | 0.79 |
|       |         | SALL4    | SALL4   | SALL4   | SALL4   | SALL4   | SALL4   | SALL4    | SALL4    | 0.57   | 0.41   | 0.18  | 0.16  | 0.49  | 1.00 | 0.71 | 0.31 | 0.27 | 0.85 |
|       |         | SMAD3    |         |         |         |         |         | SMAD3    | SMAD3    | 69.01  | 71.86  | 30.38 | 20.14 | 10.15 | 1.00 | 1.04 | 0.44 | 0.29 | 0.15 |
|       |         | SMARCA4  | SMARCA4 | SMARCA4 | SMARCA4 | SMARCA4 | SMARCA4 | SMARCA4  | SMARCA4  | 31.26  | 23.05  | 11.86 | 14.09 | 29.51 | 1.00 | 0.74 | 0.38 | 0.45 | 0.94 |
|       |         | SOS1     |         |         |         |         |         | SOS1     | SOS1     | 13.94  | 6.88   | 4.13  | 4.63  | 7.28  | 1.00 | 0.49 | 0.30 | 0.33 | 0.52 |
| SRC   | SRC     |          |         |         |         |         |         | SRC      | SRC      | 21.64  | 11.10  | 5.92  | 9.55  | 27.57 | 1.00 | 0.51 | 0.27 | 0.44 | 1.27 |
|       | SVIL    | SVIL     | SVIL    | SVIL    | SVIL    | SVIL    | SVIL    | SVIL     | SVIL     | 3.05   | 2.58   | 1.23  | 0.94  | 1.21  | 1.00 | 0.85 | 0.40 | 0.31 | 0.40 |
|       | TBL1XR1 |          |         |         |         |         |         | TBL1XR1  | TBL1XR1  | 37.46  | 24.16  | 13.33 | 8.00  | 5.50  | 1.00 | 0.64 | 0.36 | 0.21 | 0.15 |
|       | TCF4    | TCF4     | TCF4    | TCF4    | TCF4    | TCF4    | TCF4    | TCF4     | TCF4     | 4.81   | 3.57   | 1.86  | 0.95  | 1.04  | 1.00 | 0.74 | 0.39 | 0.20 | 0.22 |
|       |         | TCF7L1   |         |         |         |         |         | TCF7L1   | TCF7L1   | 2.23   | 1.53   | 0.37  | 0.49  | 1.21  | 1.00 | 0.69 | 0.17 | 0.22 | 0.54 |
|       |         | TCF7L2   | TCF7L2  | TCF7L2  | TCF7L2  | TCF7L2  | TCF7L2  | TCF7L2   | TCF7L2   | 14.75  | 6.97   | 5.23  | 5.58  | 8.74  | 1.00 | 0.47 | 0.35 | 0.38 | 0.59 |
|       |         |          |         |         |         |         |         | TDRD7    | TDRD7    | 12.74  | 7.55   | 4.46  | 5.35  | 8.79  | 1.00 | 0.59 | 0.35 | 0.42 | 0.69 |
|       |         | TLE1     | TLE1    | TLE1    | TLE1    | TLE1    | TLE1    | TLE1     | TLE1     | 8.62   | 5.63   | 2.12  | 2.22  | 6.65  | 1.00 | 0.65 | 0.25 | 0.26 | 0.77 |
|       |         | TLE4     | TLE4    | TLE4    | TLE4    | TLE4    | TLE4    | TLE4     | TLE4     | 9.70   | 5.10   | 2.67  | 2.33  | 3.03  | 1.00 | 0.53 | 0.27 | 0.24 | 0.31 |
|       |         |          |         |         |         |         |         | WEE1     | WEE1     | 15.54  | 9.73   | 7.71  | 6.45  | 3.44  | 1.00 | 0.63 | 0.50 | 0.42 | 0.22 |
|       |         | WNT3     |         |         |         | WNT3    |         | WNT3     | WNT3     | 0.97   | 0.63   | 0.25  | 0.15  | 1.57  | 1.00 | 0.64 | 0.26 | 0.15 | 1.61 |
|       |         |          |         |         |         |         | ZBTB33  | ZBTB33   | ZBTB33   | 13.69  | 7.71   | 6.06  | 5.48  | 8.87  | 1.00 | 0.56 | 0.44 | 0.40 | 0.65 |
|       | ZNF318  | ZNF318   | ZNF318  | ZNF318  | ZNF318  | ZNF318  | ZNF318  | ZNF318   | ZNF318   | 5.69   | 2.98   | 1.75  | 2.35  | 4.65  | 1.00 | 0.52 | 0.31 | 0.41 | 0.82 |
